# Supplementary material
Source: publisher figshare collection journal article supplement (https://frontiersin.figshare.com/ndownloader/files/12724928)

**Figure S1. Computational analysis of the Q/N-rich proteins devoid of PrLDs in *P. falciparum* proteome.** Clusters of GO enriched terms for each ontology; biological process in blue, cellular component in green and molecular function in orange. The enrichment analysis was performed with Functional Annotation Tool of DAVID 6.7 database using high stringency clusters, p-value  $\leq 0.05$  for GO terms.

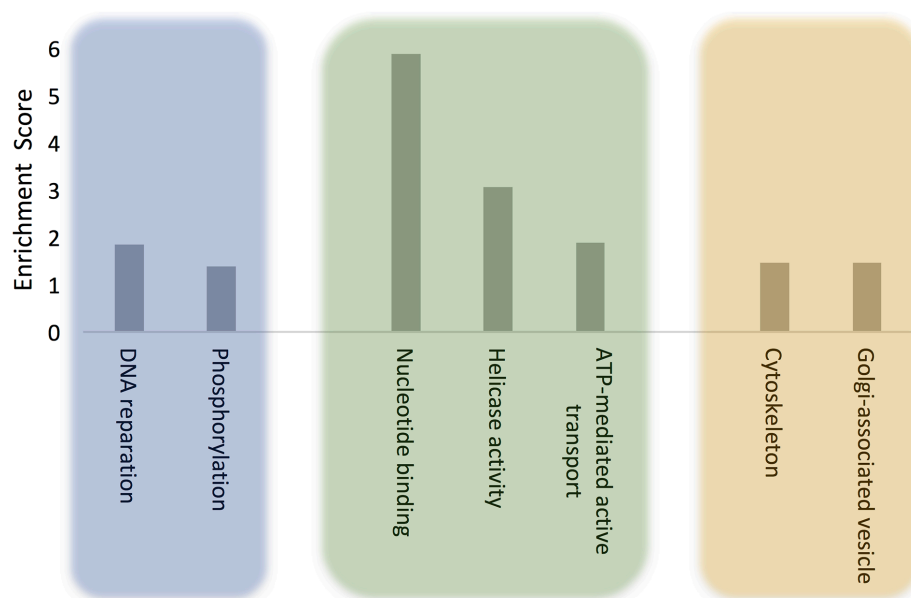

**Figure S2. Size of *P. falciparum* Q/N-rich prion-like proteins.** The size of 5353 and 503 proteins were analyzed and averaged for the complete proteome and the prion-like subset, respectively. The mean size of the proteins in the entire proteome is  $764 \pm 1193$  residues. The mean size of the proteins in the prion-like subset is  $1755 \pm 59$  residues. The P value for the unpaired t test  $< 0.0001$ .

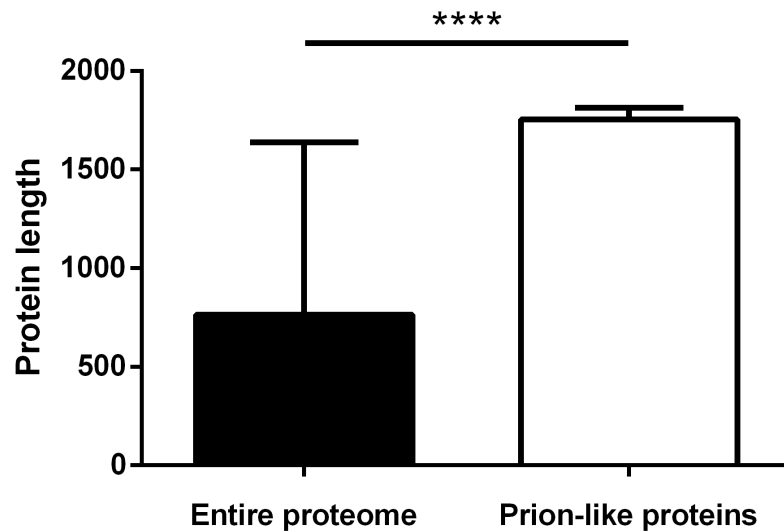

**Figure S3. Developmental stages with highest prion-like protein expression.** Highest expression stage for prion-like proteins in *P. falciparum*'s life cycle. Data corresponds to 10% highest scoring prion-like proteins (n=51).

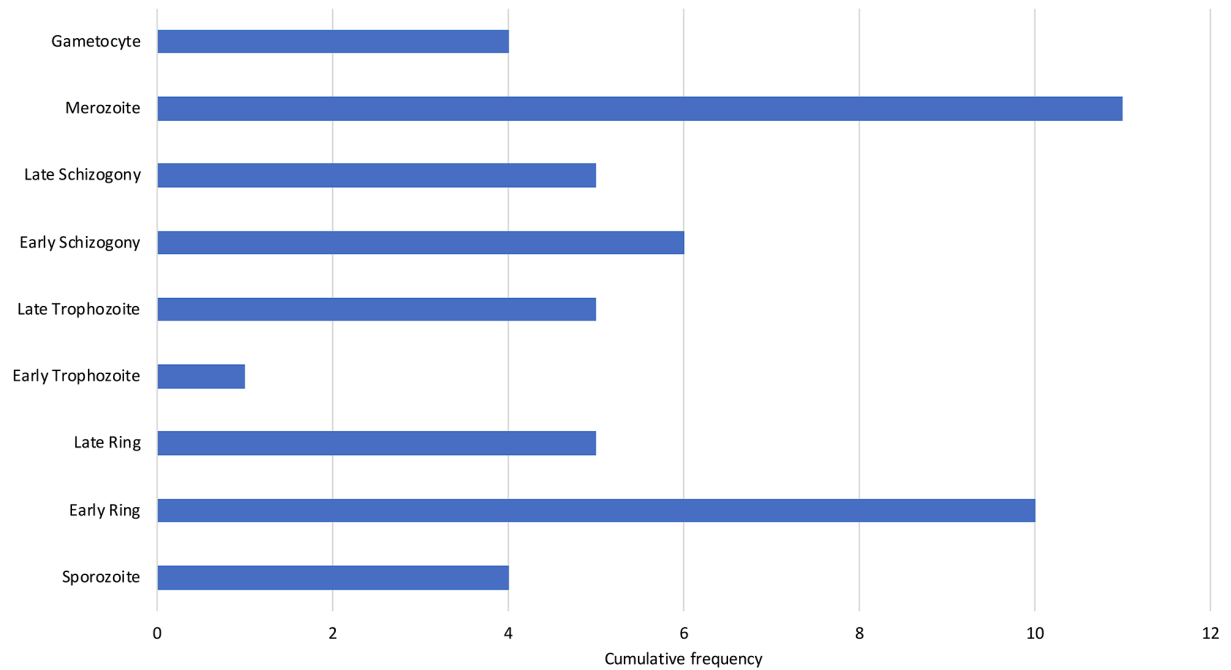

Supplement: Supplementary file [file 12724928]
